# Supplementary material
Source: PubMed Central journal article supplement (PMC3650352)
Supplement: supp_M112.023291_mcp.M112.023291-1.pdf [file supp_M112.023291_mcp.M112.023291-1.pdf]

## Supplemental Tables:

| Vector Backbone | RM mutant constructs  | Insert length (bp) | Insert length (aa) | Predicted MW without tag (kD) |
|-----------------|-----------------------|--------------------|--------------------|-------------------------------|
| pEGFP-C1        | RAXA                  | 3069               | 1023               | 113                           |
| pEGFP-C1        | 1-135                 | 405                | 135                | 15                            |
| pEGFP-/mCh-C1   | 1-305                 | 915                | 305                | 33                            |
| pEGFP-/mCh-C1   | 1-496                 | 1488               | 496                | 54                            |
| pEGFP-C1        | 1-591                 | 1773               | 591                | 65                            |
| pEGFP-C1        | 135-305               | 510                | 170                | 19                            |
| pEGFP-C1        | 305-496               | 573                | 191                | 21                            |
| pEGFP-/mCh-C1   | 305-713               | 1224               | 408                | 46                            |
| pEGFP-/mCh-C1   | 496-591               | 285                | 95                 | 11                            |
| pEGFP-/mCh-C1   | 496-713               |                    |                    |                               |
| pEGFP-/mCh-C1   | (stop codon inserted) | 1581               | 217                | 24                            |
| pEGFP-/mCh-C1   | 496-1023              | 1581               | 527                | 59                            |
| pEGFP-C1        | 591-1023              | 1296               | 432                | 48                            |
| pEGFP-C1        | 713-946               | 699                | 233                | 26                            |
| pEGFP-/mCh-C1   | 713-1023              | 930                | 310                | 35                            |

**Supplemental Table S1. RepoMan truncation mutants generated**

| Antigen                                  | Source                |                  | Clonality     | Species | Dilution (WB) |
|------------------------------------------|-----------------------|------------------|---------------|---------|---------------|
| GFP                                      | Roche                 | 11814460001      | 2 monoclonals | mouse   | 1:1000        |
| RFP                                      | chromotek             | 5f8              | monoclonal    | rat     | 1:1000        |
| RepoMan                                  | Abcam                 | ab45129          | polyclonal    | rabbit  | 1:1000        |
| PP1 $\gamma$                             | Santa Cruz            | sc-6108          | polyclonal    | goat    | 1:1000        |
| pan-PP1 (sold as $\alpha$ -PP1 $\beta$ ) | Millipore             | 07-1217          | polyclonal    | rabbit  | 1:1000        |
| KPNA2                                    | Abcam                 | ab6036           | polyclonal    | goat    | 1:1000        |
| KPNB1                                    | Thermo Scientific     | MA3-070          | monoclonal    | mouse   | 1:1000        |
| KPNA4                                    | Bethyl Laboratories   | A301-627A        | polyclonal    | rabbit  | 1:1000        |
| IPO7                                     | Abnova                | H00010527-M07    | monoclonal    | mouse   | 1:1000        |
| NUP153                                   | Bethyl Laboratories   | A301-789A        | polyclonal    | rabbit  | 1:1000        |
| MAb414                                   | Covance               | MMS-120P         | monoclonal    | mouse   | 1:1000        |
| PP2A/R1A                                 | Cell Signaling        | #2260            | monoclonal    | rat     | 1:250         |
| PP2A                                     | Cell Signaling        | #2259            | monoclonal    | rabbit  | 1:250         |
| PP2A/R5C (B56 $\gamma$ )                 | Santa Cruz            | sc-67038         | polyclonal    | rabbit  | 1:250         |
| RPL7                                     | Abcam                 | ab72550          | polyclonal    | rabbit  | 1:1000        |
| RPS6                                     | Lifespan Biosciences  | LS-C117710/31360 | polyclonal    | rabbit  | 1:1000        |
| Nucleolin                                | Abcam                 | ab22758          | polyclonal    | rabbit  | 1:1000        |
| 14-3-3 $\zeta$                           | Cell Signaling        | #9639            | polyclonal    | rabbit  | 1:250         |
| pan-14-3-3                               | Santa Cruz            | sc-629           | polyclonal    | rabbit  | 1:250         |
| PRKDC                                    | Proteintech group     | 19983-1-AP       | polyclonal    | rabbit  | 1:500         |
| Histone H3                               | Abcam                 | ab1791           | polyclonal    | rabbit  | 1:1000        |
| Caprin1                                  | Proteintech group     | 15112-1-AP       | polyclonal    | rabbit  | 1:500         |
| G3BP2                                    | Abcam                 | ab86135          | polyclonal    | rabbit  | 1:500         |
| hn RNP K/J                               | Sigma                 | R8903            | monoclonal    | mouse   | 1:499         |
| hn RNP A1                                | Abcam                 | ab5832           | monoclonal    | mouse   | 1:500         |
| Nucleolin                                | Abcam                 | ab22758          | polyclonal    | rabbit  | 1:1000        |
| Lamin A/C                                | Santa Cruz            | sc-7292          | monoclonal    | mouse   | 1:500         |
| Tubulin                                  | Sigma                 | T 6199           | monoclonal    | mouse   | 1:1000        |
| Nucleophosmin/B23                        | Sigma                 | B 0556           | monoclonal    | mouse   | 1:1000        |
| A190                                     | J. Zomerdijk          | gift             | polyclonal    | sheep   | 1:250         |
| PRMT1                                    | Sigma                 | P1620            | monoclonal    | mouse   | 1:1000        |
| PRMT5                                    | Sigma                 | P0493            | monoclonal    | mouse   | 1:1000        |
| SmB                                      | Abcam                 | ab3138           | monoclonal    | mouse   | 1:1000        |
| CKIIa                                    | Abcam                 | ab75309          | polyclonal    | rabbit  | 1:250         |
| NSEP1                                    | Aviva Systems Biology | ARP34395_P050    | polyclonal    | rabbit  | 1:1000        |
| Histone H1.X                             | Abcam                 | ab31972          | polyclonal    | rabbit  | 1:500         |
| XPOT/Crm1                                | Santa Cruz            | sc-74454         | monoclonal    | mouse   | 1:100         |
| P16INK4a/CDKN2A                          | R&D Systems           | AF5779           | polyclonal    | goat    | 1:250         |
| PARP                                     | Cell Signaling        | #9542            | polyclonal    | rabbit  | 1:1000        |

**Supplemental Table S2. Antibodies used for immunoblotting and immunoprecipitation**

# A

| Protein        | Run 1  |           |               |           | Run 2  |           |               |           |
|----------------|--------|-----------|---------------|-----------|--------|-----------|---------------|-----------|
|                | # peps | Ratio M:L | Sig B, p<0.05 | Ratio H:L | # peps | Ratio M:L | Sig B, p<0.05 | Ratio H:L |
| RepoMan(1-496) | 22     | 32.4      | 1.78E-71      | 0.77      | 25     | 21.27     | 2.43E-57      | 0.77      |
| PP1 $\beta$    | 6      | 27.77     | 9.02E-46      | 0.71      | 6      | 10.67     | 2.14E-37      | 0.49      |
| KPNA2          | 14     | 13.86     | 1.08E-44      | 0.65      | 12     | 14.93     | 2.83E-47      | 0.64      |
| PP1 $\gamma$   | 2      | 19.06     | 1.17E-44      | 0.79      | 2      | 17.09     | 1.12E-36      | 0.32      |
| KPNB1          | 23     | 13.76     | 1.67E-44      | 0.66      | 20     | 8.98      | 1.13E-35      | 0.6       |
| PP1 $\alpha$   | 4      | 10.37     | 1.51E-37      | 0.74      | 4      | 8.22      | 1.12E-36      | 0.54      |
| KPNA4          | 2      | 8.64      | 4.93E-33      | 0.9       | 1      | 8.89      | 2.25E-35      | NQ        |
| KPNA1          | 3      | 5.71      | 2.69E-24      | 0.92      | ND     |           |               |           |
| NUP153         | 7      | 4.53      | 5.23E-20      | 0.71      | 3      | 3.14      | 7.05E-15      | 0.26      |
| IPO7           | 2      | 1.61      | 2.94E-06      | 2.01      | 2      | 1.98      | 1.11E-18      | 2.22      |
| NUP50          | 1      | NQ        |               | NQ        | 3      | 5.55      | 4.55E-06      | 0.4       |

# B

| Protein                | Run 1  |           |           |               | Run 2  |           |           |               |
|------------------------|--------|-----------|-----------|---------------|--------|-----------|-----------|---------------|
|                        | # peps | Ratio M:L | Ratio H:L | Sig B, p<0.05 | # peps | Ratio M:L | Ratio H:L | Sig B, p<0.05 |
| RepoMan(496-1023)      | 12     | 0.66      | 36.50     | 7.14E-07      | 15     | 0.66      | 17.91     | 1.59E-05      |
| PPP2R5C / B56 $\gamma$ | 2      | 0.37      | 9.15      | 0.00151       | 2      | 0.65      | 5.65      | 0.00177       |
| PPP2R1A                | 10     | 1.07      | 6.39      | 0.00687       | 9      | 0.84      | 6.13      | 0.00113       |
| RPL10A                 | 5      | 0.51      | 4.36      | 0.02770       | 3      | 0.50      | 3.94      | 0.00860       |
| RPL12                  | 2      | 0.54      | 4.28      | 0.02937       | 3      | 0.56      | 3.99      | 0.01616       |
| RPLP0                  | 2      | 0.38      | 4.08      | 0.03447       | 3      | 0.41      | 4.00      | 0.00959       |
| RPL6                   | 2      | 0.60      | 4.02      | 0.03615       | 3      | 0.39      | 3.20      | 0.00610       |
| RPL27                  | 2      | 0.54      | 4.01      | 0.03625       | 2      | 0.66      | 4.09      | 0.00885       |
| RPL7A                  | 4      | 0.59      | 3.90      | 0.03975       | 6      | 0.54      | 3.81      | 0.01015       |
| RPL8                   | 2      | 0.59      | 3.86      | 0.04087       | 3      | 0.61      | 3.66      | 0.01459       |
| RPS8                   | 2      | 0.38      | 3.75      | 0.04505       | 3      | 0.44      | 4.19      | 0.01122       |
| RPLP2                  | 2      | 0.59      | 3.64      | 0.04903       | 3      | 0.58      | 4.18      | 0.00677       |
| RPL5                   | 4      | 0.34      | 3.61      |               | 3      | 0.46      | 3.48      | 0.01616       |
| RPS19                  | 2      | 0.39      | 3.58      |               | 3      | 0.33      | 3.70      | 0.01381       |
| RPL28                  | 3      | 0.56      | 3.51      |               | 1      | NQ        | NQ        |               |
| RPL7                   | 2      | 0.59      | 3.48      |               | 6      | 0.55      | 4.26      | 0.00729       |
| RPL13A                 | 3      | 0.63      | 3.40      |               | 3      | 0.47      | 4.10      |               |
| RPS18                  | 3      | 0.38      | 3.39      |               | 5      | 0.34      | 3.18      | 0.03252       |
| RPS10L                 | 2      | 0.26      | 3.38      |               | 2      | 0.35      | 3.25      | 0.03379       |
| RPS24                  | 3      | 0.29      | 3.21      |               | 3      | 0.43      | 3.77      | 0.01281       |
| RPL13                  | 2      | 1.09      | 3.05      |               | 2      | 0.60      | 3.09      | 0.02924       |
| NSEP1/YBX1             | 3      | 0.40      | 2.92      |               | 5      | NQ        | NQ        |               |
| PPP2CA                 | 4      | 0.90      | 2.90      |               | 3      | 0.87      | 2.66      |               |
| RPL10                  | 2      | 0.60      | 2.88      |               | ND     |           |           |               |
| RPS3                   | 5      | 0.47      | 2.78      |               | 7      | 0.50      | 2.46      |               |
| NCL                    | 7      | 0.62      | 2.74      |               | 7      | 0.64      | 3.02      | 0.03209       |
| RPL11                  | 2      | 0.47      | 2.74      |               | 2      | 0.59      | 2.79      | 0.04368       |
| RPS16                  | 7      | 0.47      | 2.69      |               | 8      | 0.40      | 2.64      |               |
| RPL26                  | 3      | 0.36      | 2.54      |               | 1      | 0.35      | 2.46      |               |
| RPS20                  | 2      | 0.61      | 2.39      |               | 3      | 0.50      | 2.01      |               |
| RPS12                  | 2      | 0.48      | 2.38      |               | 2      | 0.48      | 2.46      |               |
| RPS2                   | 4      | 0.51      | 2.37      |               | 4      | 0.41      | 2.17      |               |
| NEXN                   | 3      | 0.22      | 2.23      |               | 2      | 0.19      | 1.81      |               |
| IPO7                   | 2      | 1.62      | 2.02      |               | 2      | 1.98      | 2.22      |               |
| DDX21                  | 2      | 0.01      | 2.00      |               | 4      | 0.55      | 1.79      |               |
| RPL19                  | 2      | 0.69      | 2.00      |               | ND     |           |           |               |
| CDKN2                  | 2      | 0.76      | 1.98      |               | ND     |           |           |               |
| ACTN4                  | 43     | 0.15      | 1.92      |               | 39     | 0.15      | 1.88      |               |
| PRMT5                  | 3      | 0.70      | 1.75      |               | ND     |           |           |               |
| RPS11                  | 2      | 0.43      | 1.74      |               | ND     |           |           |               |
| RPL31                  | 3      | 0.54      | 1.73      |               | ND     |           |           |               |
| C19orf21               | 4      | 0.16      | 1.68      |               | 2      | 0.15      | 1.47      |               |
| DBN1                   | 8      | 0.25      | 1.66      |               | 5      | 0.14      | 1.60      |               |
| NPM                    | 4      | 0.50      | 1.59      |               | 4      | 0.45      | 1.40      |               |
| PAB1                   | 7      | 0.42      | 1.56      |               | 9      | 0.39      | 1.51      |               |
| ACTN1                  | 27     | 0.17      | 1.56      |               | 24     | 0.16      | 1.52      |               |

**Supplemental Table S3. N- (1-496, M) and C- (496-1023, H) terminal-specific RepoMan interactors.** Proteins identified in the quantitative mass spectrometry experiment by 2 or more peptides and with SILAC ratios  $> 1.5$  are shown here (full datasets provided as Supplemental Datasets). A. Proteins enriched with GFP-RepoMan/1-496. B. Proteins enriched with GFP-RepoMan/496-1023. Runs 1 and 2 indicate technical replicates of the SILAC IP experiment. Significance B values indicate variance from mean log ratios for a chosen confidence threshold value ( $p < 0.05$ ). Proteins in bold were validated as RepoMan interactors by co-IP/WB analysis. Protein classes highlighted: RepoMan (dark green), PP1 (light green), import factors (yellow), PP2A complex members (orange), RPLs (dark pink) and RPSs (light pink). ND: not detected in this run. NQ: not quantified in this run.

| Protein                  | Run 1     |              |               |             | Run 2     |              |               |             |
|--------------------------|-----------|--------------|---------------|-------------|-----------|--------------|---------------|-------------|
|                          | # peps    | Ratio M:L    | Sig B, p<0.05 | Ratio H:L   | # peps    | Ratio M:L    | Sig B, p<0.05 | Ratio H:L   |
| <b>RepoMan (496-713)</b> | <b>10</b> | <b>21.89</b> | <b>0.049</b>  | <b>0.85</b> | <b>11</b> | <b>23.56</b> | <b>0.041</b>  | <b>1.62</b> |
| PPP2R5E/ B56ε            | 8         | 17.66        |               | 0.35        | 10        | 10.88        |               | 0.47        |
| PPP2R1A                  | 22        | 16.32        |               | 0.51        | 25        | 15.27        |               | 0.59        |
| <b>PPP2R5C/ B56γ</b>     | <b>14</b> | <b>14.65</b> |               | <b>0.37</b> | <b>16</b> | <b>8.85</b>  |               | <b>0.51</b> |
| CK2A1                    | 4         | 14.61        |               | 0.57        | 5         | 9.70         |               | 0.59        |
| CK2A2                    | 7         | 11.71        |               | 0.45        | 7         | 5.59         |               | 0.69        |
| <b>PPP2CA</b>            | <b>10</b> | <b>10.96</b> |               | <b>0.59</b> | <b>7</b>  | <b>14.43</b> |               | <b>0.49</b> |
| PPM1C                    | 3         | 10.31        |               | 0.62        | 8         | 7.51         |               | 0.75        |
| <b>IPO7</b>              | <b>14</b> | <b>9.97</b>  |               | <b>1.13</b> | <b>16</b> | <b>9.14</b>  |               | <b>0.90</b> |
| RPS10                    | 5         | 9.94         |               | 0.68        | 6         | 7.64         |               | 0.56        |
| MEP50                    | 2         | 9.92         |               | 2.38        | 1         | NQ           |               | NQ          |
| RPS18                    | 5         | 9.29         |               | 0.57        | 5         | 7.35         |               | 0.54        |
| RPL1                     | 7         | 9.05         |               | <b>0.88</b> | <b>11</b> | <b>7.65</b>  |               | <b>0.85</b> |
| MRPS23                   | 2         | 8.94         |               | NQ          | ND        |              |               |             |
| RPLP2                    | 6         | 8.78         |               | <b>0.78</b> | <b>6</b>  | <b>8.05</b>  |               | <b>0.81</b> |
| RPS25                    | 4         | 8.52         |               | 0.56        | 3         | 8.35         |               | 0.56        |
| UBE20                    | 7         | 8.48         |               | 0.49        | 8         | 4.51         |               | 0.61        |
| <b>RPL7</b>              | <b>10</b> | <b>8.26</b>  |               | <b>0.83</b> | <b>14</b> | <b>8.55</b>  |               | <b>0.78</b> |
| RPL6                     | 5         | 8.24         |               | 0.70        | 7         | 7.80         |               | 0.81        |
| RPL14                    | 4         | 8.20         |               | <b>0.79</b> | <b>4</b>  | <b>7.55</b>  |               | <b>0.85</b> |
| RPL13A                   | 2         | 7.88         |               | 0.56        | 2         | 3.00         |               | 0.46        |
| RPS29                    | 1         | 7.87         |               | 0.53        | 2         | 5.47         |               | 0.51        |
| <b>NCL</b>               | <b>21</b> | <b>7.82</b>  |               | <b>0.82</b> | <b>21</b> | <b>7.29</b>  |               | <b>0.82</b> |
| RPL10A                   | 6         | 7.77         |               | <b>0.86</b> | <b>7</b>  | <b>6.65</b>  |               | <b>0.82</b> |
| RPS19                    | 3         | 7.68         |               | 0.67        | 5         | 7.60         |               | 0.60        |
| NAP1L1                   | 4         | 7.63         |               | 0.53        | 4         | 6.41         |               | 0.70        |
| RPLP0                    | 8         | 7.58         |               | <b>0.82</b> | <b>8</b>  | <b>6.70</b>  |               | <b>0.70</b> |
| RPL30                    | 3         | 7.50         |               | <b>0.77</b> | <b>3</b>  | <b>7.98</b>  |               | <b>1.04</b> |
| SIR2L1                   | 7         | 7.48         |               | 0.49        | 9         | 4.36         |               | 0.39        |
| RPS16                    | 7         | 7.40         |               | 0.61        | 9         | 7.70         |               | 0.59        |
| RPL11                    | 2         | 7.25         |               | <b>0.98</b> | <b>2</b>  | <b>6.62</b>  |               | <b>0.86</b> |
| RPS12                    | 5         | 7.24         |               | 0.63        | 6         | 6.43         |               | 0.68        |
| RPL12                    | 6         | 7.22         |               | <b>0.74</b> | <b>6</b>  | <b>7.39</b>  |               | <b>0.73</b> |
| RPL18                    | 5         | 7.15         |               | 0.66        | 6         | 7.43         |               | 0.80        |
| <b>RPL27</b>             | <b>4</b>  | <b>7.15</b>  |               | <b>0.70</b> | <b>7</b>  | <b>8.00</b>  |               | <b>0.77</b> |
| KPNB2                    | 6         | 7.05         |               | <b>1.80</b> | <b>5</b>  | <b>4.56</b>  |               | <b>2.22</b> |
| RPL7A                    | 8         | 6.94         |               | <b>0.83</b> | <b>11</b> | <b>7.83</b>  |               | <b>0.92</b> |
| C18orf25                 | 2         | 6.92         |               | 0.20        | 1         | NQ           |               | NQ          |
| <b>PPP2R5A/ B56α</b>     | <b>3</b>  | <b>6.87</b>  |               | <b>0.89</b> | <b>6</b>  | <b>4.82</b>  |               | <b>0.50</b> |
| RPL31                    | 2         | 6.87         |               | 1.24        | 2         | NQ           |               | NQ          |
| RPL8                     | 3         | 6.84         |               | <b>0.65</b> | <b>3</b>  | <b>9.84</b>  |               | <b>0.83</b> |
| RPS20                    | 4         | 6.81         |               | 0.55        | 3         | 7.06         |               | 0.54        |
| RPS3                     | 17        | 6.80         |               | 0.68        | 13        | 6.41         |               | 0.59        |
| PRMT5                    | 5         | 6.74         |               | 1.37        | 7         | 6.23         |               | 1.29        |
| RPL13                    | 6         | 6.74         |               | 0.76        | 5         | 7.02         |               | 0.74        |
| RPL36                    | 3         | 6.66         |               | 0.28        | 4         | 5.07         |               | 0.66        |
| RPS5                     | 3         | 6.58         |               | 0.50        | 4         | 4.88         |               | 0.65        |
| RPL21                    | 4         | 6.58         |               | <b>0.59</b> | <b>5</b>  | <b>8.77</b>  |               | <b>0.81</b> |
| RPL3                     | 6         | 6.57         |               | <b>0.69</b> | <b>8</b>  | <b>6.17</b>  |               | <b>0.80</b> |
| RPL26                    | 2         | 6.36         |               | <b>0.87</b> | <b>3</b>  | <b>5.67</b>  |               | <b>0.74</b> |
| NSEP1                    | 4         | 6.29         |               | 0.66        | 6         | 5.79         |               | 0.66        |
| RPS3A                    | 5         | 6.26         |               | 0.89        | 6         | 6.00         |               | 0.79        |
| RPS9                     | 8         | 6.23         |               | 0.74        | 8         | 5.72         |               | 0.79        |
| RPS8                     | 4         | 6.23         |               | 0.67        | 4         | 6.73         |               | 0.61        |
| <b>RPS6</b>              | <b>6</b>  | <b>6.08</b>  |               | <b>0.89</b> | <b>3</b>  | <b>5.49</b>  |               | <b>0.79</b> |
| RPS24                    | 2         | 6.04         |               | 0.72        | 2         | 6.11         |               | 0.70        |
| RPL15                    | 3         | 5.90         |               | 0.13        | 4         | 5.39         |               | 0.58        |
| <b>PPP2R5D/ B56δ</b>     | <b>7</b>  | <b>5.87</b>  |               | <b>0.98</b> | <b>9</b>  | <b>5.14</b>  |               | <b>0.57</b> |
| CSDA                     | 3         | 5.84         |               | 0.75        | 5         | NQ           |               | NQ          |
| RPL23A                   | 2         | 5.82         |               | <b>0.83</b> | <b>6</b>  | <b>5.65</b>  |               | <b>0.86</b> |
| RPL35                    | 2         | 5.80         |               | <b>0.83</b> | <b>4</b>  | <b>5.41</b>  |               | <b>0.77</b> |
| H1FX                     | 2         | 5.80         |               | <b>0.75</b> | <b>1</b>  | <b>NQ</b>    |               | <b>NQ</b>   |
| <b>NPM</b>               | <b>6</b>  | <b>5.75</b>  |               | <b>0.93</b> | <b>4</b>  | <b>5.77</b>  |               | <b>0.98</b> |
| RPS2                     | 6         | 5.60         |               | 0.62        | 7         | 5.76         |               | 0.64        |
| RPL9                     | 8         | 5.51         |               | <b>0.78</b> | <b>6</b>  | <b>5.59</b>  |               | <b>0.79</b> |
| C1QBP                    | 2         | 5.39         |               | 1.07        | 2         | 4.97         |               | 0.93        |
| <b>RPL5</b>              | <b>6</b>  | <b>5.19</b>  |               | <b>0.83</b> | <b>6</b>  | <b>6.32</b>  |               | <b>0.88</b> |
| AHCYL2                   | 2         | 5.14         |               | 1.09        | ND        |              |               |             |
| RPSA                     | 7         | 5.07         |               | 0.58        | 9         | 4.39         |               | 0.45        |

**Supplemental Table S4. RepoMan interactors specific to the 496-713 domain.** Proteins identified in the quantitative mass spectrometry experiment by 2 or more peptides and with SILAC ratios  $> 5$  are shown here (full datasets provided as Supplemental Datasets). Significance B values indicate variance from mean log ratios for a chosen confidence threshold value ( $p < 0.05$ ). The shift of such a larger number of proteins from the mean affects significance calculations, with only the RepoMan fragment itself appearing to be significantly enriched above background. Runs 1 and 2 indicate technical replicates of the SILAC IP experiment. Proteins in bold were validated as RepoMan interactors by co-IP/WB analysis. Protein classes highlighted: RepoMan (green), import factors (yellow), PP2A complex members (orange), RPLs (dark pink), RPSs (light pink) and histones (turquoise). ND: not detected in this run. NQ: not quantified in this run.

| Protein                   | Run 1     |             |              |                 | Run 2     |             |              |                 |
|---------------------------|-----------|-------------|--------------|-----------------|-----------|-------------|--------------|-----------------|
|                           | # peps    | Ratio M:L   | Ratio H:L    | Sig B, p<0.05   | # peps    | Ratio M:L   | Ratio H:L    | Sig B, p<0.05   |
| <b>RepoMan (713-1023)</b> | <b>21</b> | <b>2.05</b> | <b>38.98</b> | <b>1.50E-08</b> | <b>21</b> | <b>1.42</b> | <b>28.58</b> | <b>3.21E-12</b> |
| YWHAG / 14-3-3 $\gamma$   | 6         | 0.77        | 10.46        | 0.0003          | 6         | 0.64        | 10.28        | 1.49E-08        |
| YWHAE / 14-3-3 $\epsilon$ | 11        | 0.76        | 10.27        | 0.0003          | 10        | 0.81        | 9.55         | 1.43E-07        |
| YWHAZ / 14-3-3 $\zeta$    | 8         | 0.83        | 9.36         | 0.0005          | 7         | 0.79        | 8.52         | 4.47E-07        |
| YWHAQ / 14-3-3 $\theta$   | 5         | 0.86        | 8.19         | 0.0011          | 4         | 0.75        | 8.66         | 3.86E-07        |
| MSH6                      | 4         | 1.12        | 5.81         | 0.0060          | ND        |             |              |                 |
| TUBB2C                    | 23        | 1.17        | 5.79         | 0.0061          | 24        | 1.13        | 5.66         | 4.09E+05        |
| COPB                      | 2         | 1.01        | 5.48         | 0.0079          | 1         | 0.31        | 3.54         | 2.09E-03        |
| TUBA1                     | 15        | 1.05        | 5.44         | 0.0082          | 16        | 0.86        | 5.14         | 1.06E-03        |
| TRIP13                    | 4         | 0.81        | 5.33         | 0.0090          | 5         | 0.83        | 4.40         | 3.62E-03        |
| TUBB                      | 22        | 1.06        | 5.26         | 0.0095          | 24        | 1.15        | 5.63         | 3.80E-05        |
| GLUT1                     | 3         | 0.94        | 4.62         | 0.0167          | 1         | NQ          | NQ           |                 |
| TUBB4                     | 18        | 1.15        | 4.60         | 0.0169          | 20        | 1.11        | 3.56         | 7.54E-04        |
| MCT1                      | 2         | 1.16        | 4.54         | 0.0179          | ND        |             |              |                 |
| TUBA1B                    | 17        | 0.88        | 4.41         | 0.0201          | 16        | 0.92        | 4.40         | 3.90E-04        |
| DFFRX                     | 2         | 1.93        | 4.25         | 0.0234          | ND        |             |              |                 |
| SLC25A3                   | 2         | 1.30        | 4.23         | 0.0238          | 1         | NQ          | NQ           |                 |
| DNAJ2                     | 2         | 1.00        | 3.98         | 0.0302          | 2         | 0.76        | 4.20         | 0.0003          |
| SURF4                     | 2         | 1.97        | 3.91         | 0.0325          | 1         | NQ          | NQ           |                 |
| XPOT                      | 2         | 1.32        | 3.76         | 0.0374          | ND        |             |              |                 |
| <b>PRKDC</b>              | <b>56</b> | <b>1.23</b> | <b>3.73</b>  | <b>0.0387</b>   | <b>37</b> | <b>1.05</b> | <b>3.85</b>  | <b>0.0010</b>   |
| SLC25A5                   | 6         | 0.98        | 3.71         | 0.0397          | 8         | 0.94        | 3.51         | 0.0022          |
| CAND1                     | 8         | 4.14        | 3.66         | 0.0416          | 4         | 2.88        | 2.04         |                 |
| TUBB2                     | 19        | 0.82        | 3.54         | 0.0471          | ND        |             |              |                 |
| DHC1                      | 11        | 0.85        | 3.52         | 0.0479          | 4         | 0.83        | 2.63         | 0.0091          |
| MCM6                      | 2         | 1.43        | 3.44         |                 | 1         | NQ          | NQ           |                 |
| CTPS                      | 3         | 1.23        | 3.44         |                 | 2         | NQ          | NQ           |                 |
| ATAD3A                    | 5         | 0.75        | 3.42         |                 | 1         | NQ          | NQ           |                 |
| C17orf27                  | 3         | 0.24        | 3.36         |                 | 3         | NQ          | 3.66         |                 |
| NUP160                    | 6         | 1.24        | 3.35         |                 | ND        |             |              |                 |
| CPS1                      | 8         | 1.10        | 3.34         |                 | 2         | 0.90        | 3.34         |                 |
| PFKF                      | 4         | 0.95        | 3.24         |                 | 1         | NQ          | NQ           |                 |
| ACAC                      | 8         | 0.83        | 3.20         |                 | 1         | NQ          | NQ           |                 |
| SLC25A13                  | 5         | 0.95        | 3.20         |                 | 2         | 0.88        | 3.45         |                 |
| SLC25A6                   | 6         | 0.95        | 2.98         |                 | 6         | 1.13        | 3.32         |                 |
| IARS                      | 6         | 0.96        | 2.92         |                 | 3         | 0.92        | 2.99         |                 |
| COPG                      | 3         | 0.79        | 2.91         |                 | 1         | NQ          | NQ           |                 |
| CAD                       | 17        | 0.69        | 2.87         |                 | 9         | 0.68        | 2.95         |                 |
| NSUN2                     | 2         | 1.25        | 2.79         |                 | 1         | NQ          | NQ           |                 |
| SLC3A2                    | 2         | 1.08        | 2.70         |                 | 4         | 0.98        | 2.48         |                 |
| ATP5A                     | 6         | 0.89        | 2.59         |                 | 5         | 1.01        | 2.71         |                 |
| RPL23                     | 3         | 1.80        | 2.59         |                 | 2         | 1.81        | 2.96         |                 |
| TKT                       | 9         | 0.94        | 2.57         |                 | 7         | 0.93        | 2.48         |                 |
| XPO1                      | 2         | 0.05        | 2.53         |                 | 4         | 0.94        | 2.92         |                 |
| GCN1L1                    | 5         | 0.83        | 2.49         |                 | 1         | NQ          | NQ           |                 |
| EIF3B                     | 2         | 1.42        | 2.44         |                 | 1         | NQ          | NQ           |                 |
| HKMT1069                  | 2         | 9.92        | 2.38         |                 | 1         | NQ          | NQ           |                 |
| CCT1                      | 3         | 1.02        | 2.36         |                 | 2         | 0.89        | 1.81         |                 |
| PGDH3                     | 3         | 0.96        | 2.24         |                 | 3         | 0.89        | 2.16         |                 |
| RPS15A                    | 5         | 1.87        | 2.22         |                 | 4         | 2.01        | 2.01         |                 |
| SLC20A4                   | 3         | 0.74        | 2.19         |                 | 1         | 0.56        | 1.77         |                 |
| CDC47                     | 5         | 0.81        | 2.15         |                 | 5         | 0.66        | 1.99         |                 |
| BAP                       | 5         | 1.12        | 2.09         |                 | 1         | 0.56        | 1.77         |                 |
| PHB                       | 4         | 1.13        | 2.07         |                 | 3         | 0.86        | 1.64         |                 |
| CBP1                      | 2         | 0.91        | 2.01         |                 | 1         | NQ          | NQ           |                 |
| PPP2R2A                   | 3         | 4.19        | 2.00         |                 | 2         | 3.59        | 1.36         |                 |

**Supplemental Table S5. RepoMan interactors specific to the 713-1023 domain.** Proteins identified in the quantitative mass spectrometry experiment by 2 or more peptides and with

SILAC ratios  $> 2$  are shown here (full datasets provided as Supplemental Datasets). Significance B values indicate variance from mean log ratios for a chosen confidence threshold value ( $p < 0.05$ ). Runs 1 and 2 indicate technical replicates of the SILAC IP experiment. Proteins in bold were validated as RepoMan interactors by co-IP/WB analysis. Protein classes highlighted: RepoMan (green), import factors (yellow), PP2A complex members (orange), RPLs (dark pink), RPSs (light pink) and DNA damage response-related proteins (blue). ND: not detected in this run. NQ: not quantified in this run.



## Supplemental Figure Legends

**Supplementary Figure 1. Truncation mutant dynamics.** A. FLIP (Fluorescence Loss In Photobleaching) experiment demonstrating that cleavage of RepoMan at residue 591 (into 1-591 and 591-1023 fragments) results in a C-terminal fragment (591-1023) that is not retained efficiently in the nucleus. A cytoplasmic ROI was continually photobleached every 1 second for a total of 126 seconds, with images taken after each bleach event. The intensity over time of a nuclear region of interest is normalized for any photobleaching due to image acquisition and plotted. Data are mean  $\pm$  SE (n = 4-7, 3 separate experiments). GFP alone (shuttles freely) and full-length GFP-tagged RepoMan (does not shuttle) are shown for comparison. B. FRAP (Fluorescence Recovery After Photobleaching) experiment comparing the turnover rate of GFP-tagged fragments 1-591 (green) and 591-1023 (purple) to that of full-length GFP-tagged RepoMan (red) and free GFP (blue). A pre-bleach image was acquired, a nucleoplasmic ROI photobleached at the 0 time point and the GFP signal within that ROI monitored over time. C. FRAP experiment, carried out as described above, comparing the turnover rate of the 1-305 (green) and 305-713 (purple) and 713-1023 (turquoise) GFP-RepoMan fragments to that of the full-length protein (red) and free GFP (blue). D. FRAP experiment comparing the turnover rate of the N-terminal 1-305 (green), 1-496 (purple) and 1-591 (turquoise) GFP-RepoMan fragments to that of the full-length protein (red) and free GFP (blue), focusing on the early post-bleach time points. For all FRAP experiments shown here, data are mean  $\pm$  SE (n = 7-31, 3 separate experiments).

**Supplementary Figure 2. Transient overexpression of GFP-RepoMan (or fragments used for interactome study) has no effect on cell cycle distribution.** A. FACS analysis of HeLa

cells 24 hours after Effectene-based transfection with pEGFP, pEGFP-RepoMan, pEGFP-RepoMan/RAXA or the 4 RepoMan truncation mutants used in the fragmentome experiments (1-496, 496-1023, 496-713 and 713-1023). Non-transfected cells are shown for comparison. B. FACS analysis of HeLa cells 24 hours after Polyethylenimine (PEI)-based transfection with pEGFP, pEGFP-RepoMan, pEGFP-RepoMan/RAXA or the 4 RepoMan truncation mutants used for the fragmentome experiments (1-496, 496-1023, 496-713 and 713-1023). Non-transfected cells are shown for comparison. C. Table summarizing the cell cycle distributions (between G1, S and G2/M) for each condition. D. Equivalent total protein amounts of cell lysates were analyzed by Western blot, using anti-GFP antibodies, to demonstrate the relative amounts of fusion protein expressed. Transfection efficiencies ranged from 40-80%.

**Supplementary Figure 3. Fragmentome approach increases sensitivity of detection of interactors.** A. Peptides detected in the SILAC IP experiment comparing mCh-RepoMan to the non-PP1 binding mutant mCh-RepoMan/RAXA are highlighted in purple, with sequence coverage and normalized intensity (summed peptide intensity/MW of RepoMan \*  $1e^6$ ) noted below. B. Peptides detected in the fragmentome experiment comparing the N-terminal (1-496, orange) and C-terminal (496-1023, green) halves of RepoMan. Sequence coverage and normalized intensity (summed intensity for all RepoMan peptides detected/MW of RepoMan \*  $1e^6$ ) noted below. C. Distribution of protein classes between N- and C-terminal halves of RepoMan. Relative abundance (summed peptide intensities for each protein normalized to molecular weight) vs. log H:M (enrichment with FP-RepoMan/1-496 vs. FP-RepoMan/496-1023) was plotted and the main protein classes of RepoMan interactors identified in our interactome screens highlighted, as indicated in the legend.

**Supplementary Figure 4. Subcellular distribution and additional validation experiments. A.**

Fractionation of HeLa cells and analysis of cell equivalent volumes of CP (cytoplasmic), NP (nucleoplasmic) and No (nucleolar) extracts by WB using anti-RepoMan (RM) antibodies and antibodies raised against cell compartment-specific proteins (CP, alpha-tubulin; NP, Lamin A/C; No, RNA Pol I subunit A190). B. Fractionation of HeLa cells into cytoplasmic (CP) and nuclear (NP) extracts for analysis of RepoMan and PP2Ac/R1A/B56 $\gamma$  complex member distribution between these cellular compartments. In the top right panel, HeLa cells transiently expressing FP-RepoMan were fractionated and analyzed by WB using anti-RepoMan antibodies, to compare cellular distribution of FP-tagged and endogenous protein. C. Fractionation of HeLa cells transiently expressing either FP-tagged RepoMan fragment 1-496 or 496-1023 and analysis of cell equivalent volumes of cytoplasmic (CP) and nuclear (NP) extracts using anti-FP antibodies to detect the fusion proteins (and the indicated cell compartment-specific markers). D. Validation of the co-purification of endogenous RepoMan with the FP-tagged importins KPNA2 and KPNA1. E. Validation of the co-purification of both endogenous RepoMan and G3BP2 with FP-tagged Caprin. F. Demonstration of the C-terminal domain-specificity of the interaction between RepoMan and Caprin (496-713), histone H3 (713-1023) and hnRNP A1 (496-713). An equal enrichment of hnRNP K was observed with both fragments (496-713 and 713-1023). G. Co-IP/WB experiment testing whether the phosphorylation status of amino acid S591 in RepoMan affects interaction with the PP2Ac/R1A/B56 $\gamma$  complex. Western blot analysis was carried out using the antibodies indicated. Anti-FP antibodies were used to demonstrate the amount of fusion protein (or free FP) recovered in each IP.

**Supplementary Figure 5. Additional validation and domain-specific mapping of ribosomal protein and histone H3 interaction with RepoMan.** A. Western blot demonstrating mapping of the interaction of the 496-591 domain of RepoMan with RPL7 and nucleolin (NCL). Control IPs of FP alone and FP fused to a nuclear localization signal (FP-NLS) are shown for comparison. B. Summary of the co-purification of RPL7, RPS6 and NCL with FP-RepoMan vs. FP alone, as measured by quantitative Western blot analysis (n = 4 independent experiments). The bars indicate enrichment of each protein normalized to the amount of fusion protein recovered. Asterisks indicate significant enrichment of these interactors above the control FP IP ( $p < 0.05$  in an unpaired Student's t-test). C. The 496-591 fragment of RM is predominantly nuclear and shows additional accumulation in nucleoli, as shown here by fluorescence imaging of PFA-fixed HeLa cells transiently expressing GFP-RepoMan/496-591 and stained with antibodies raised against NCL, a marker for the nucleolus (arrow). Scale bar is 5  $\mu$ M. WB analysis of nuclei purified from these cells and fractionated into separate nucleoplasmic (NP) and nucleolar (No) extracts demonstrates the distribution of the 496-591 fragment between the nucleoplasm and nucleoli. In the left panel, anti-Lamin A/C (nuclear envelope marker) and anti-nucleophosmin (NPM, nucleolar marker) antibodies demonstrate the purity of the fractions. Anti-FP detects FP-RepoMan/496-591 in both, albeit with the majority of the fusion protein found in the nucleoplasm. The panel on the right shows that endogenous RPL7 co-purifies predominantly with the nucleoplasmic pool of FP-RepoMan/496-591. A control IP of FP alone from nuclear extracts is shown for comparison. D. In the FLIP experiment shown here, the same pool of nucleolar GFP-RM was repeatedly photobleached every second (arrows) for a total of 126 seconds, with images taken after each bleach event. The intensity over time for three different nuclear regions of interest (dark gray squares, neighbouring nucleoplasm; gray circles, other

nucleolus; pale gray triangles, remote area of nucleoplasm) was normalized for photobleaching due to image acquisition and plotted. Data are mean  $\pm$  SE (n = 4-7, 2 separate experiments). Decreasing fluorescence indicates loss of GFP-RepoMan signal as it continuously shuttles through the nucleolus and is photobleached. E. Western blot demonstrating the domain-specific enrichment (496-1023 and 713-1023) of histone H3 with RepoMan. F. Summary of the copurification of histone H3 with RepoMan and RepoMan fragments as measured by quantitative Western blot analysis (n = 3-4 independent experiments). The bars indicate enrichment of H3 with the GFP fusion proteins relative to the amount enriched in a control GFP-alone IP, with the dashed line at 1 indicating the same enrichment with both. Asterisks indicate significant enrichment of histone H3 above the control IP ( $p < 0.05$  in an unpaired Student's t-test).

**Supplementary Figure 6. Full Western blots for data shown in Figures 1 and 4.** Lines indicate where lanes not presented in the figure were omitted, while dashed lines indicate where a Western blot was cut so that different regions could be probed with different antibodies, and then reassembled for chemiluminescence imaging. Dashed arrows indicate where sections of a cut Western blot were reassembled for probing of the entire blot with a single antibody. All antibodies used are indicated below the blots. Molecular weight standards are shown to the left of each blot. Lanes are as indicated. “Data not shown” indicates regions of a blot that were probed with different antibodies, with the data obtained not presented in this study. “RM” indicates wild type RepoMan and “RAXA” the non PP1-binding mutant.

**Supplementary Figure 7. Full Western blots for data shown in Figures 5 and 7.** Lines indicate where lanes not presented in the figure were omitted, while dashed lines indicate where

a Western blot was cut so that different regions could be probed with different antibodies, and then reassembled for chemiluminescence imaging. Dashed arrows indicate where sections of a cut Western blot were reassembled for probing of the entire blot with a single antibody. All antibodies used are indicated below the blots. Molecular weight standards are shown to the left of each blot. Lanes are as indicated. “Data not shown” indicates regions of a blot that were probed with different antibodies, with the data obtained not presented in this study.

Abbreviations used here include Async (asynchronous), Noc (nocodazole), Thy (thymidine), HU (hydroxyurea), Mim (L-mimosine) and Tax (taxol). “WT” indicates wild type RepoMan and “RAXA” the non PP1-binding mutant.

**Supplementary Figure 8. Full Western blots for data shown in Figure 6.** Lines indicate where lanes not presented in the figure were omitted, while dashed lines indicate where a Western blot was cut so that different regions could be probed with different antibodies, and then reassembled for chemiluminescence imaging. Dashed arrows indicate where sections of a cut Western blot were reassembled for probing of the entire blot with a single antibody. All antibodies used are indicated below the blots. Molecular weight standards are shown to the left of each blot. Lanes are as indicated. “Data not shown” indicates regions of a blot that were probed with different antibodies, with the data obtained not presented in this study. “WT” indicates wild type RepoMan and “RAXA” the non PP1-binding mutant.

**Supplemental Figure 9. Mascot search results for RepoMan phosphopeptide mapping experiment.**

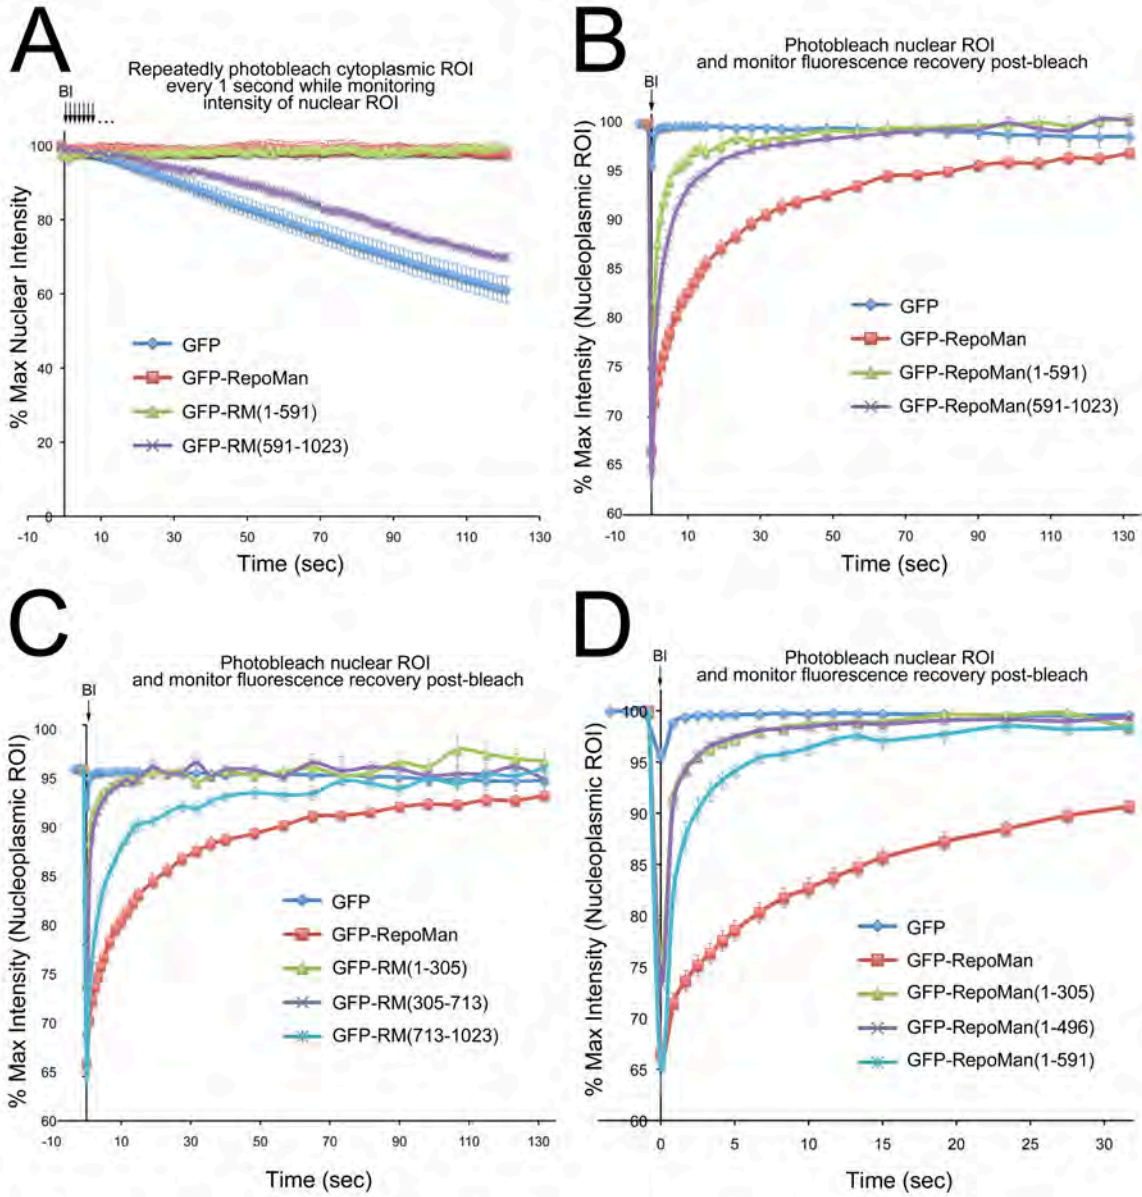

Supplemental Figure 1

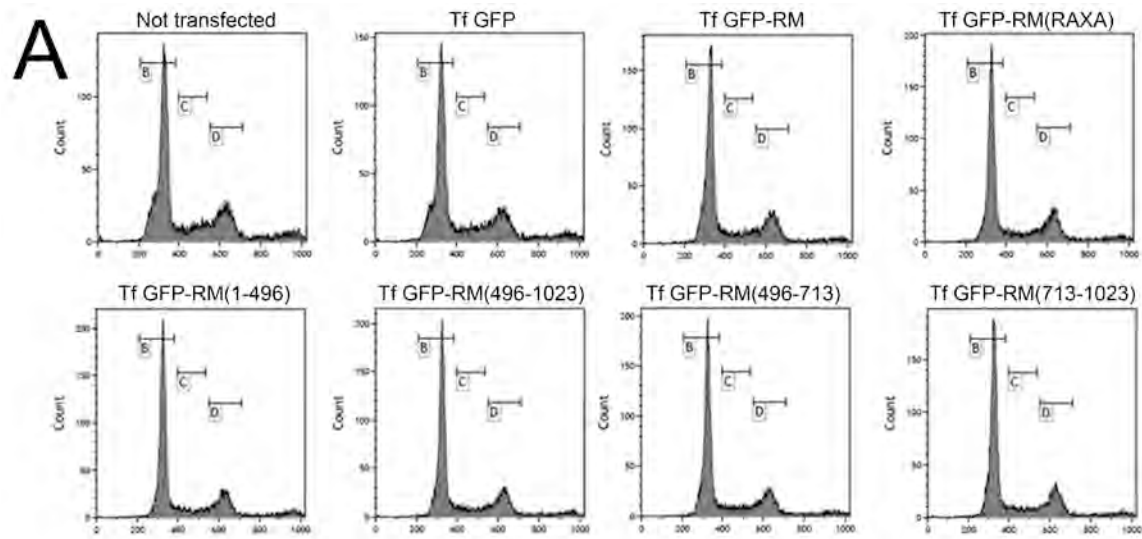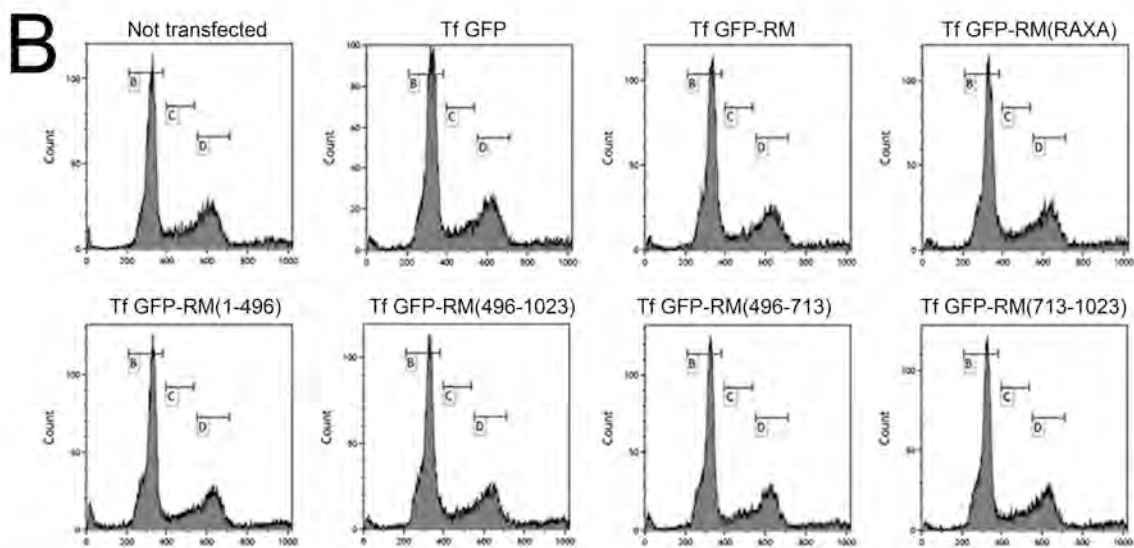

**C**

| Effectene | % G1 | % S  | % G2/M |
|-----------|------|------|--------|
| not Tf    | 65.4 | 12.0 | 22.6   |
| GFP       | 66.7 | 11.8 | 21.5   |
| RM        | 67.0 | 10.7 | 22.3   |
| RM RAXA   | 66.1 | 10.2 | 23.7   |
| 1-496     | 67.6 | 10.0 | 22.5   |
| 496-1023  | 67.0 | 10.4 | 22.6   |
| 496-713   | 67.1 | 11.1 | 21.9   |
| 713-1023  | 67.7 | 10.6 | 21.7   |

  

| PEI      | % G1 | % S  | % G2/M |
|----------|------|------|--------|
| not Tf   | 60.4 | 13.6 | 26.0   |
| GFP      | 61.7 | 12.8 | 25.5   |
| RM       | 63.6 | 11.0 | 25.5   |
| RM RAXA  | 61.2 | 12.4 | 26.4   |
| 1-496    | 63.5 | 11.9 | 24.7   |
| 496-1023 | 62.8 | 12.3 | 24.9   |
| 496-713  | 63.3 | 11.7 | 25.0   |
| 713-1023 | 63.5 | 12.1 | 24.4   |

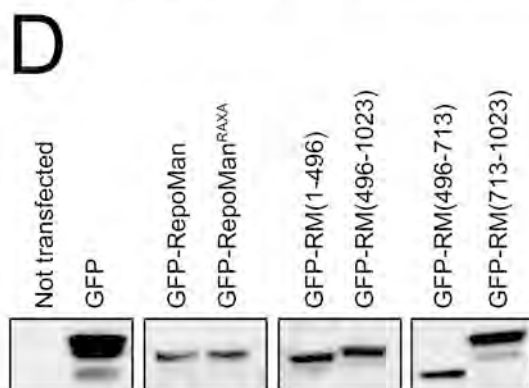

Supplemental Figure 2





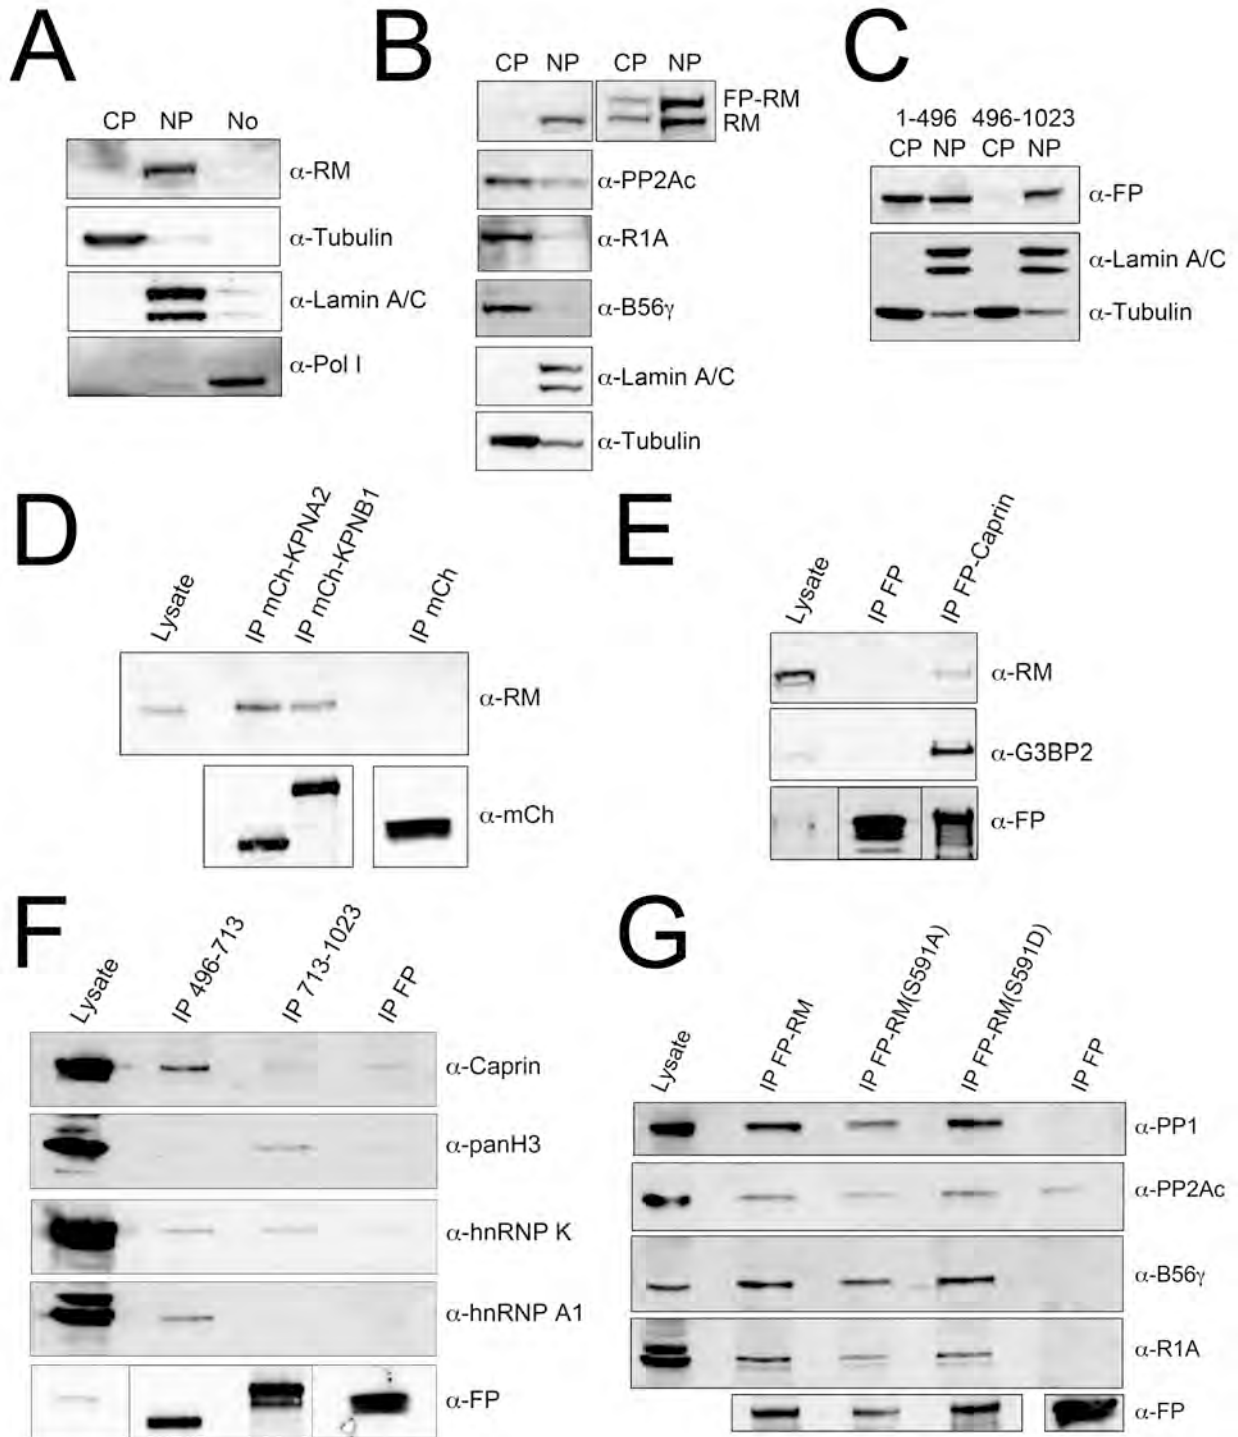

Supplemental Figure 4

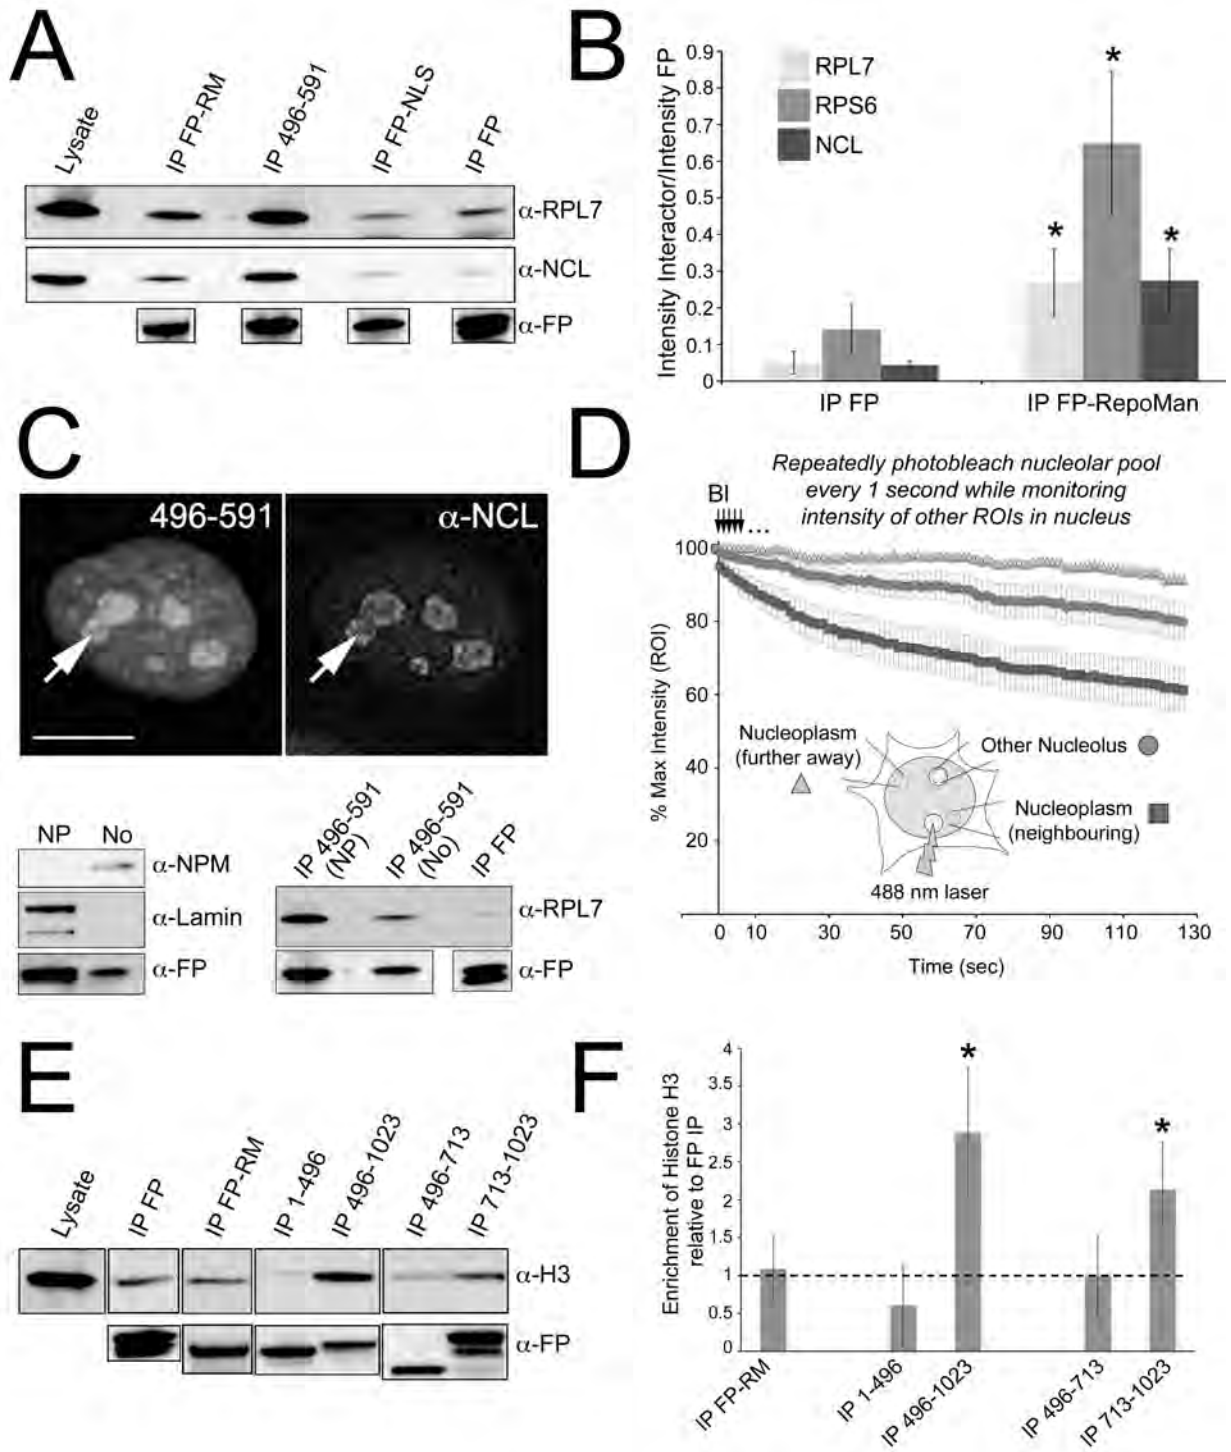

Supplemental Figure 5

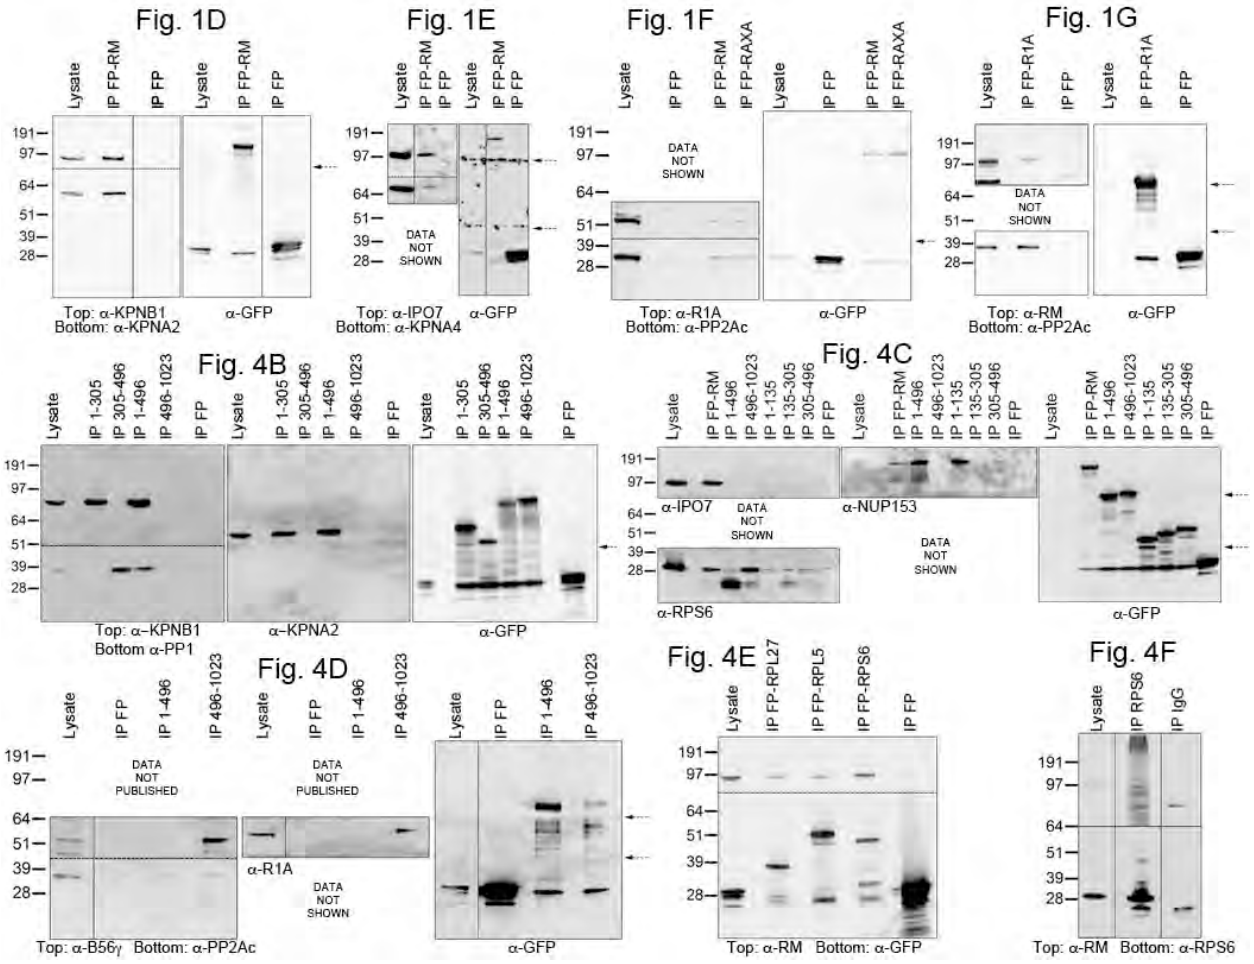

Supplemental Figure 6

Fig. 5A

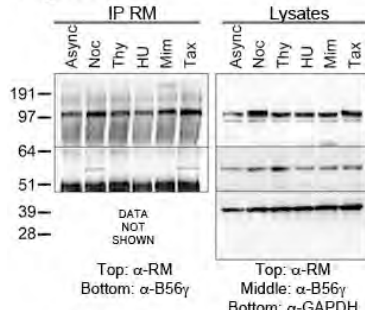

Fig. 5B

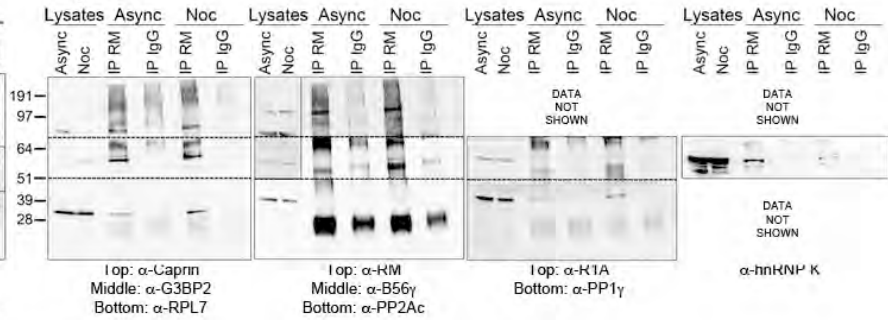

Fig. 5D

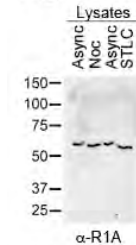

Fig. 5E

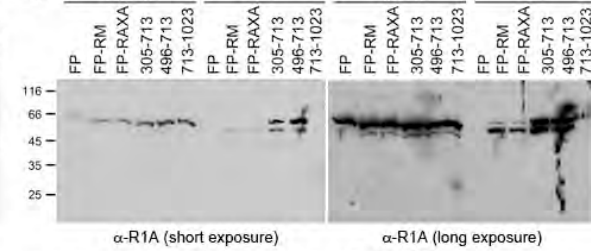

Fig. 7C

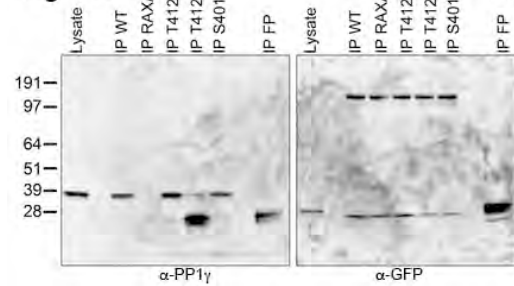

Fig. 7E

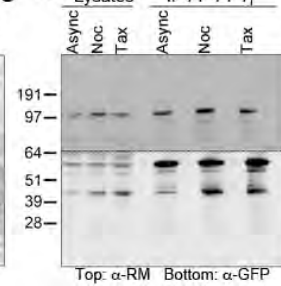

Fig. 7F

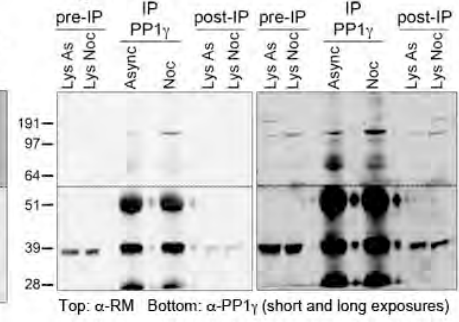

Supplemental Figure 7

Fig. 6B

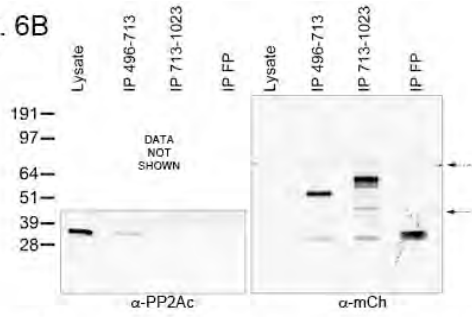

Fig. 6C

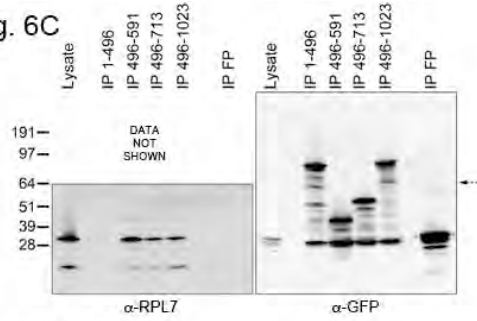

Fig. 6D

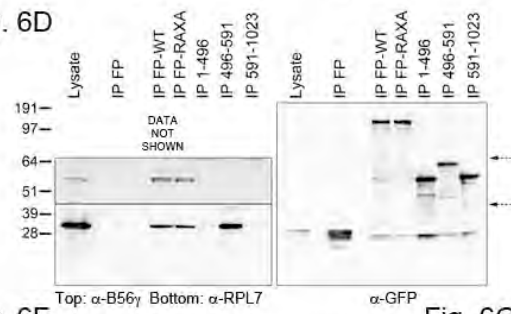

Fig. 6E

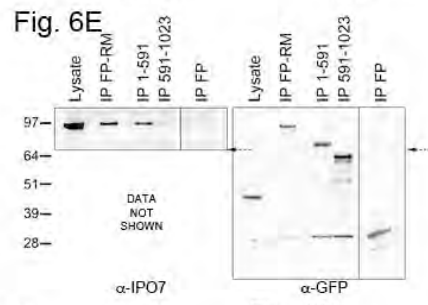

Fig. 6F

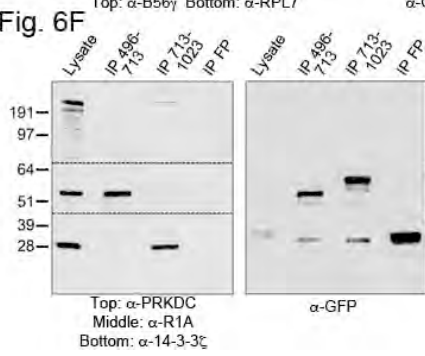

Fig. 6G

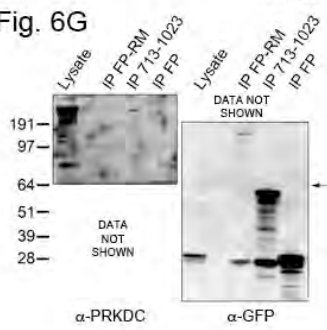

Fig. 6H

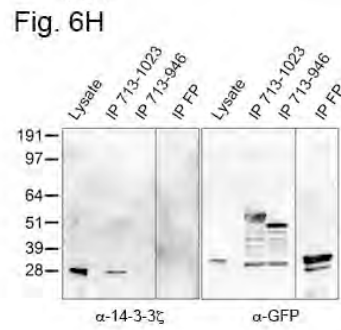

Supplemental Figure 8
